# Supplementary material
Source: PubMed Central journal article supplement (PMC2492459)
Supplement: 0800939105_0800939105SI.pdf [file 0800939105_0800939105SI.pdf]

# Supporting Information

Schewe and Aguirre-Ghiso 10.1073/pnas.0800939105

## SI Text

**Methods. Reagents.** Tunicamycin (Tm), Thapsigargin (Tg), DTT and Doxorubicin (Dox) were from Sigma. SB203580 was obtained from Calbiochem, and rapamycin was from LC Laboratories. SCIO-469 was kindly provided by Amit Verma (Albert Einstein College of Medicine, Bronx, NY).

**Antibodies.** Anti-ATF6 $\alpha$  antibody was from Imgenex, anti-grp78 antibody was from BD. Anti-cleaved Caspase3, anti-Rheb, anti-p-Akt, anti-Akt, and anti-p-S6 ribosomal protein antibodies were from Cell Signaling Technology, and mouse anti-GAPDH antibody was from Calbiochem. Anti- $\beta$ -tubulin antibody was from Abcam. HRP-conjugated mouse secondary antibodies and mounting media were from Vector Laboratories. HRP-conjugated anti-rabbit antibody was from Chemicon International. Alexa Fluor 488 or 568 anti-mouse antibodies were from Invitrogen.

ATF6 $\alpha$  and XBP-1 siRNAs were from Santa Cruz Biotechnology (cat. nos. sc-37699 and sc-38627), and grp78/BiP and Rheb siRNAs were from Ambion (cat. nos. AM-16706 and AM-16708). The siRNA to p38 was from New England Biolabs (cat. no. N2004S). Scrambled siRNA from Ambion was used as negative control (cat. no. AM-4611).

The sequence of the ATF6 $\alpha$ -shRNA is 5'-TGCTGTTGACAG-TGAGCGCGGAGACAGCAACGTATGATAATAGTGAAG-CCACAGATGTATTATCATACGTTGCTGTCTCCTTGC-CTACTGCCTCGGA-3'.

For the creation of stable cell lines, Phoenix A packaging cells were seeded at low density and incubated at 37°C overnight. They were then transfected with 2  $\mu$ g of shRNA plasmid or with equal amounts of empty vector using Eugene 6 Reagent from Roche. Transfected Phoenix A cells were incubated at 32°C for 48 h, and the supernatant was collected and filtered. D-HEp3 cells ( $2-3 \times 10^5$ ) were seeded onto six-well plates and incubated at 37°C overnight. Viral supernatant was added to each well together with Polybrene to a final concentration of 8  $\mu$ g/ml (Sigma). The plate was spun at 1,500 rpm in a 5810R centrifuge from Eppendorf for 1 h at room temperature. D-HEp3 cells were incubated overnight at 32°C to allow viral infection. Medium was changed to standard medium for these cells (see above), and cells were incubated for another 48 h at 32°C. After that, infected cells were selected at a final concentration of 2.5  $\mu$ g/ml puromycin, and knockdown was assayed by RT-PCR.

For ATF6 $\alpha$  IF,  $1-3 \times 10^4$  cells were plated on glass coverslips, transfected with ATF6 $\alpha$  siRNA when applicable, and incubated 24 to 48 h. Cells were fixed in 3% PFA for 15 min on ice, washed, and permeabilized with 0.1% Triton X-100 for 5 min at room temperature. Coverslips were blocked with 3% normal goat serum (Sigma) for 30 min and then incubated with anti-ATF6 $\alpha$  antibody (1:50) for 60 min, blocked again for 30 min and incubated with Alexa Fluor 488 or 568 antibodies (1:400) for 60

min. Nuclear counterstaining was performed with Hoechst-33342 (1:10,000; Invitrogen) for 2 min, and coverslips were mounted. For cleaved caspase-3 IF, the antibody was used at 1:200 and Alexa Fluor 488 anti-rabbit antibody at 1:1,000 as a secondary antibody. Nuclei were counterstained with Hoechst-33342.

Total RNA was extracted by using TRIzol from Invitrogen. PCR primers were from IDT, sequences were: ATF6 $\alpha$  5'-TGA TGA GCT GCA ATT GGA AGC AGC-3' and 5'-ACC ACA GTA GGC TGA GAC AGC AAA-3', GAPDH 5'-CGT CAT GGG TGT GAA CCA TGA G-3' and 5'-GTA GAC GGC AGG TCA GGT CCA-3', XBP-1 5'-CCT TGT AGT TGA GAA CCA GG-3' and 5'-GGG GCT TGG TAT ATA TGT GG-3', Rheb 5'-GAT ATC ATT TGG GTC AGA GCT CCC-3' and 5'-CAG TCA AGG TCT AGG GAT TTG AGG-3'.

For *in vivo* Luc assays, cells transfected with the Luc constructs were inoculated onto CAMs of 9- to 10-day-old chicken embryos from Charles River ( $1.5 \times 10^6$  cells/CAM). At 24 or 48 h later, excised CAMs were homogenized in passive lysis buffer from the Promega kit using the Bullet Blender from Next Advance. Lysates were then frozen at -20°C, centrifuged at 14,000 rpm in a 5415R Eppendorf microcentrifuge for 10 min on the day of analysis, and processed.

For the CAM growth/survival assay, cells were detached with 2 mM EDTA in PBS, washed, and inoculated on CAMs (D-HEp3 500,000 cells/CAM and T-HEp3 150,000 cells/CAM). Cell numbers were quantified by using a hemocytometer at 7 days after excision, mincing, and collagenase treatment.

**Results.** ATF6 $\alpha$  confers a survival advantage to D-HEp3 cells upon genotoxic, ER, and nutritional stress *in vitro*. We have previously shown that D-HEp3 cells are highly resistant to Tm and glucose deprivation (10). The facts that ATF6 $\alpha$  has its predominant role in regulating genes essential for coping with ER stress, and that D-HEp3 cells have higher levels of ATF6 $\alpha$  suggested a potential prosurvival function of ATF6 $\alpha$  in these cells. We down-regulated ATF6 $\alpha$  mRNA (Fig. 3A) and protein levels (Fig. 3B). As expected, this resulted in enhanced sensitivity of D-HEp3 cells to Tm (Fig. S1C) as measured by Trypan blue exclusion test. In agreement with published data that UPR activation causes resistance to TOPO II inhibitors (ref. 10 and references within) ATF6 $\alpha$  down-regulation conferred pronounced sensitivity to Doxorubicin (Fig. S1C). Finally, whereas no significant difference in cell viability could be observed after ATF6 $\alpha$  knockdown at a dose of 5 mM glucose (data not shown), 1 mM glucose resulted in the induction of significantly more death in D-HEp3 cells after ATF6 $\alpha$  knockdown (Fig. S1C). All in all, these data point at ATF6 $\alpha$  as a regulator of D-HEp3 survival in response to ER and genotoxic stress but also to glucose restriction, a more physiological source of stress that might be encountered *in vivo*.

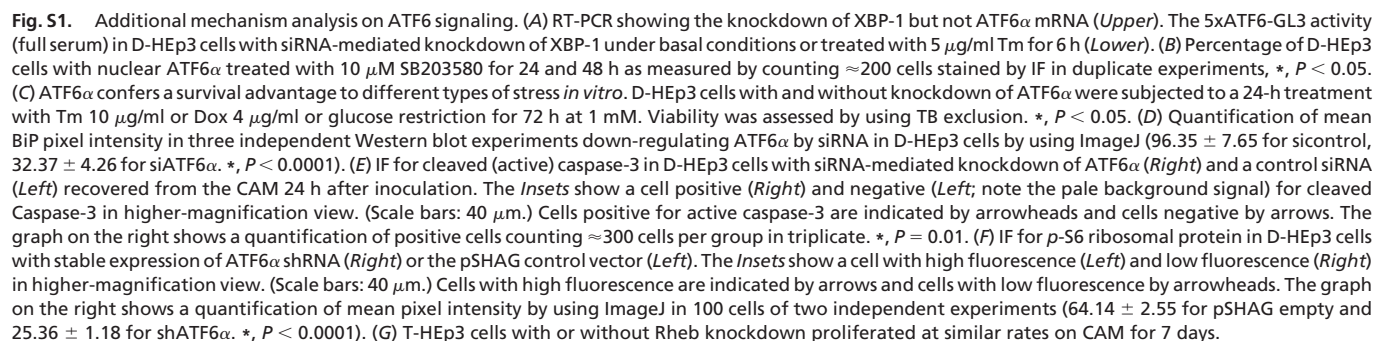

## Head and neck cancer

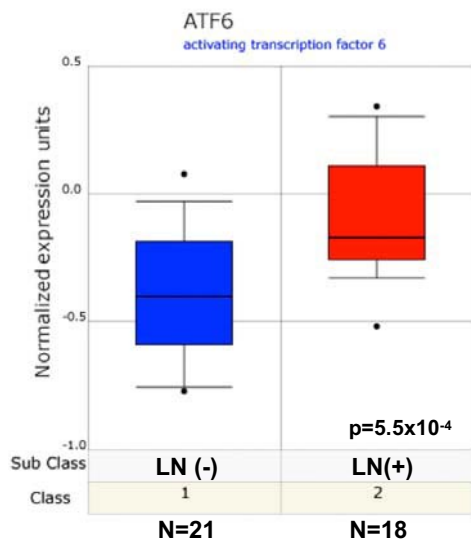

## Multicancer

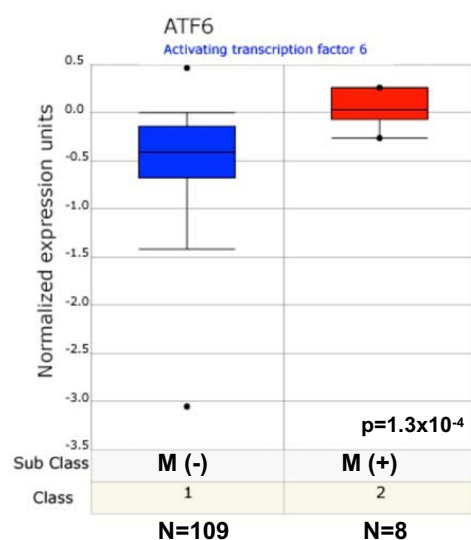

## Colorectal Cancer

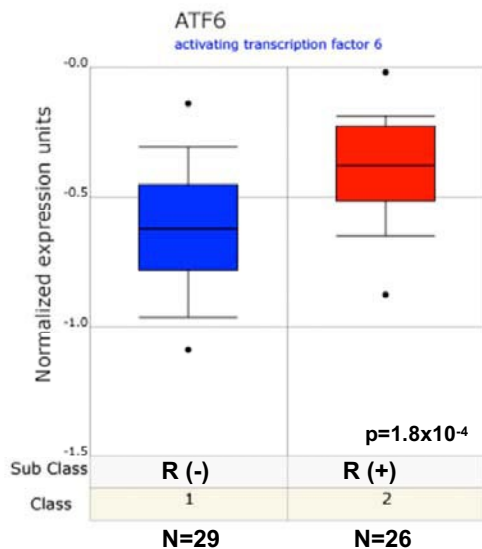

## Head and neck cancer

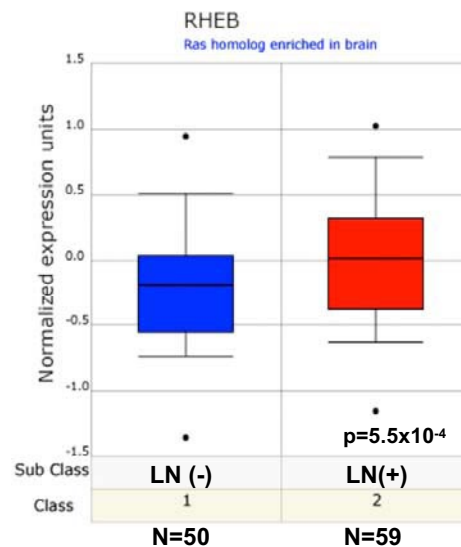

**Fig. S2.** Compiled patient data from Oncomine (13) on ATF6 as a prognostic indicator in head and neck cancer (14), colon cancer (16), and in a multicancer study (15) as well as Rheb in head and neck cancer (29). N is the number of patients for each condition. LN, lymph node; M, metastasis; R, relapse.

| Gene                                                                | Gene locus | Accession no. | -Fold<br>induction/repression | Function                                           |
|---------------------------------------------------------------------|------------|---------------|-------------------------------|----------------------------------------------------|
| Activating transcription factor 6                                   | ATF6       | NM.007348     | 10.25*                        |                                                    |
| Protein folding                                                     |            |               |                               |                                                    |
| Heat shock protein 90-kDa $\beta$ (Grp94), member 1                 | HSP90B1    | AI684643      | 1.71                          | Chaperone                                          |
| DnaJ (Hsp40) homolog, subfamily B, member 9                         | DNAJB9     | NM.012328     | 1.64                          | Chaperone                                          |
| Protein degradation                                                 |            |               |                               |                                                    |
| Ubiquitin-conjugating enzyme E2E 1 (UBC4/5 homolog, yeast)          | UBE2E1     | AI742722      | 1.93                          | Ubiquitinylation of proteins                       |
| F-box and leucine-rich repeat protein 13                            | FBXL13     | NM.145032     | 1.88                          | Ubiquitin cycle                                    |
| SEC11 homolog C ( <i>S. cerevisiae</i> )                            | SEC11C     | BF055352      | 1.59                          | Signal peptide processing                          |
| OTU domain, ubiquitin aldehyde binding 2                            | OTUB1      | AI656232      | 1.56                          | Ubiquitin iso-peptidase                            |
| Protein secretion                                                   |            |               |                               |                                                    |
| Secretogranin II (chromogranin C)                                   | SCG2       | NM.003469     | 2.96                          | Secretory granule protein                          |
| Intersectin 1 (SH3 domain protein)                                  | ITSN1      | AF114488      | 1.83                          | Endocytosis, formation of clathrin-coated vesicles |
| Component of oligomeric Golgi complex 3                             | COG3       | BC038953      | 1.63                          | Intracellular protein transport                    |
| Metabolism and transport                                            |            |               |                               |                                                    |
| Peroxisome proliferator-activated receptor- $\gamma$                | PPARG      | NM.015869     | 2.33                          | Response to nutrients, lipid metabolism            |
| ATP-binding cassette, sub-family A (ABC1), member 13                | ABCA13     | NM.152701     | 3.25                          | Transport                                          |
| Solute carrier family 2 (facilitated glucose transporter), member 3 | SLC2A3     | NM.006931     | 1.80                          | Glucose transporter                                |
| Solute carrier family 41, member 1                                  | SLC41A1    | AW439816      | -1.88                         | Cation transport                                   |
| Signal transduction                                                 |            |               |                               |                                                    |
| Rho GTPase activating protein 5                                     | ARHGAP5    | N50119        | 2.48                          | Regulation of RHO GTPases                          |
| Ras homolog enriched in brain                                       | RHEB       | NM.005614     | 2.37                          | Activator of mTOR                                  |
| Transforming growth factor, $\beta$ -receptor III                   | TGFBR3     | NM.003243     | 2.24                          | TGF signaling pathway                              |
| SMAD family member 3                                                | SMAD3      | AI475033      | 1.94                          | TGF signaling pathway                              |
| SAR1 gene homolog B ( <i>S. cerevisiae</i> )                        | SAR1B      | NM.016103     | -1.93                         | Small GTPase mediated signal transduction          |

Genes listed are examples of genes up- or down-regulated >1.5-fold ( $P < 0.05$ ) by knockdown of ATF6 $\alpha$ .  
 \*ATF6 $\alpha$  appears to be changing the most because its down-regulation is the strongest (10.25-fold).
